# Supplementary material
Source: PubMed Central journal article supplement (PMC3887930)
Supplement: molcell-36-1-39-5-supplementary.pdf [file molcell-36-1-39-5-supplementary.pdf]

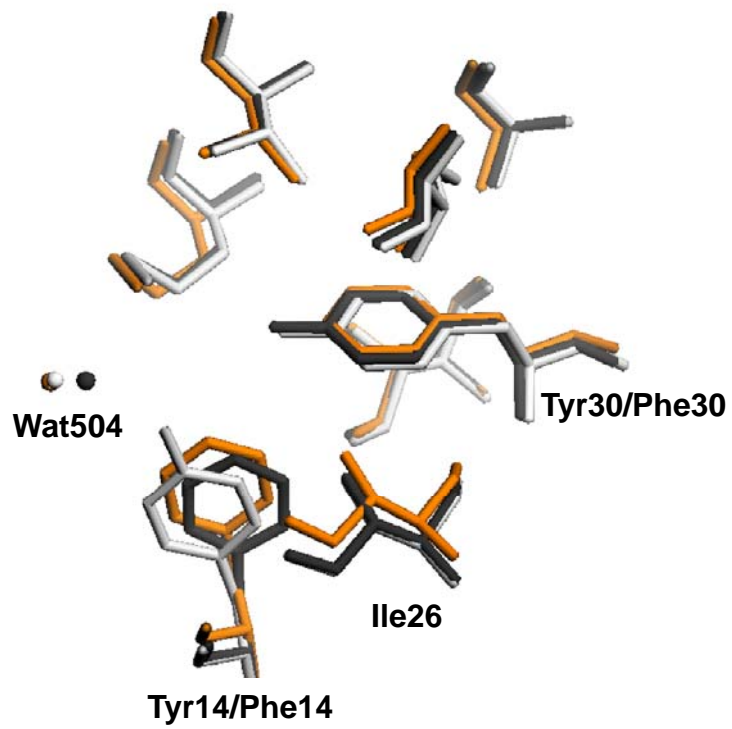

**Supplementary Fig. 1** The conformational changes near residue 30. WT (light gray; PDB code 1OPY), Y14F (dark gray; PDB code 1EA2) and Y14F/Y30F (yellow; PDB code 4K1U). The figure was prepared using PyMOL.

**Supplementary Table 1. Thermodynamic parameters from urea denaturation of WT and its mutant KSIs<sup>a</sup>**

| Enzyme         | $\Delta G_U^{\text{H}_2\text{O}}$ <sup>b</sup> (kcal/mol) | <i>m</i> -value <sup>c</sup> (kcal/mol M) | urea <sub>50%</sub> <sup>d</sup> (M) | $\Delta\Delta G_U^{\text{H}_2\text{O}}$ (kcal/mol) |
|----------------|-----------------------------------------------------------|-------------------------------------------|--------------------------------------|----------------------------------------------------|
| WT             | 24.5 ± 0.89                                               | 3.37 ± 0.19                               | 5.31 ± 0.06                          |                                                    |
| Y30F           | 24.4 ± 0.55                                               | 3.18 ± 0.06                               | 5.61 ± 0.07                          | 0.1                                                |
| Y14F           | 20.1 ± 0.53                                               | 3.07 ± 0.10                               | 4.40 ± 0.03                          | 4.4                                                |
| Y14F/Y30F      | 23.3 ± 0.05                                               | 3.24 ± 0.06                               | 5.15 ± 0.08                          | 1.2                                                |
| Y55F           | 21.0 ± 0.21                                               | 2.98 ± 0.02                               | 4.79 ± 0.08                          | 3.6                                                |
| Y30F/Y55F      | 24.3 ± 0.28                                               | 2.99 ± 0.08                               | 5.91 ± 0.08                          | 0.3                                                |
| Y14F/Y55F      | 21.8 ± 0.33                                               | 3.68 ± 0.07                               | 4.14 ± 0.10                          | 2.7                                                |
| Y14F/Y30F/Y55F | 26.1 ± 0.48                                               | 3.46 ± 0.07                               | 5.63 ± 0.03                          | -1.6                                               |

<sup>a</sup> All data collected at 25 °C in 20mM potassium phosphate, pH 7.0, 1mM DTT. <sup>b</sup> Free energy difference between the native and denatured states in units of kilocalories per mole. <sup>c</sup> The *m*-value is the change in free energy with respect to the change in [urea]. <sup>d</sup> Midpoint concentration, urea<sub>50%</sub>, is the [urea] at which half of the protein is denatured in units of molar.

**Supplementary Table 2. Thermodynamic parameters from thermal denaturation of WT and its mutant KSIs**

---

| Enzyme         | $T_m$ (°C)     |
|----------------|----------------|
| WT             | $65.6 \pm 0.3$ |
| Y30F           | $66.4 \pm 0.4$ |
| Y14F           | $59.4 \pm 0.5$ |
| Y14F/Y30F      | $65.8 \pm 0.1$ |
| Y55F           | $61.7 \pm 0.4$ |
| Y30F/Y55F      | $66.8 \pm 0.3$ |
| Y14F/Y55F      | $58.5 \pm 0.7$ |
| Y14F/Y30F/Y55F | $68.5 \pm 0.2$ |

---

**Supplementary Table 3. Contacts between the aromatic moiety of residue 30 and its surrounding residues in WT and mutant KSIs**

---

| Enzyme         | Number of contacts <sup>a</sup> |
|----------------|---------------------------------|
| WT             | 17                              |
| Y30F           | 17                              |
| Y14F           | 18                              |
| Y14F/Y30F      | 21                              |
| Y55F           | 14                              |
| Y30F/Y55F      | 19                              |
| Y14F/Y55F      | 19                              |
| Y14F/Y30F/Y55F | 21                              |

---

<sup>a</sup> All the interatomic contacts were calculated using 4.0 Å cut-off
